# Supplementary material for: Characterization of the interaction between protein Snu13p/15.5K and the Rsa1p/NUFIP factor and demonstration of its functional importance for snoRNP assembly
Source: PubMed Central journal article supplement — Nucleic Acids Res. 2013 Nov 13;42(3):2015–36. doi: 10.1093/nar/gkt1091 (PMC3919607; doi:10.1093/nar/gkt1091), 2013-11-13
Supplement: supp_gkt1091_nar-02792-r-2013-File012.pdf [file supp_gkt1091_nar-02792-r-2013-File012.pdf]

# **Characterization of the interaction between protein Snu13p/15.5K and the Rsa1p/NUFIP factor and demonstration of its functional importance for snoRNP assembly**

**Benjamin Rothé<sup>1</sup>, Régis Back<sup>1+</sup>, Marc Quinternet<sup>2</sup>, Jonathan Bizarro<sup>3</sup>, Marie-Cécile Robert<sup>3</sup>, Magali Blaud<sup>1++</sup>, Christophe Romier<sup>4</sup>, Xavier Manival<sup>1\*</sup>, Bruno Charpentier<sup>1\*</sup>, Edouard Bertrand<sup>3\*</sup>, and Christiane Branlant<sup>1</sup>**

## **SUPPLEMENTARY DATA**

### **SUPPLEMENTARY METHODS**

#### **GST pull-down assays**

Recombinant proteins GST-Snu13p, wild-type or variant E<sub>72</sub>D<sub>73</sub>K<sub>74</sub>/AAA, (0.35 nmol) were loaded onto 15 µl of beads of Glutathione-Sepharose 4B (GE Healthcare<sup>®</sup>) in 100 µl of binding buffer (10 mM phosphate pH 7.0, 150 mM NaCl). Recombinant His<sub>6</sub>Rsa1p<sub>230-266</sub> (0.7 nmol) was treated in the same way. The protein partners were incubated for 30 min at room temperature. Beads loaded with proteins were washed three times with the binding buffer. Proteins were eluted by boiling in Laemmli loading buffer. Protein fractions were resolved by SDS-PAGE on 15% polyacrylamide gels and visualized by Coomassie staining.

#### **Isothermal Titration Calorimetry**

Binding of purified Snu13p and synthetic Rsa1p<sub>238-259</sub> was measured at 20°C in 10 mM NaPi, pH 5.6, 150 mM NaCl on a VP-ITC microcalorimeter (Microcal) with a cell volume of 1.4228 mL. 28 injections of 10 µL peptide solution (1.4 mM in the needle) were performed into 130 µM of protein in the chamber. The syringe speed was set at 300 rpm and a 200 s





**Figure S3. Results of the isothermal titration calorimetry experiment performed between Snu13p and the synthetic Rsa1p<sub>238-259</sub> peptide at 20°C.** N,  $\Delta H$ ,  $\Delta S$  and  $K_d$  values depict respectively the site number, the enthalpy, the entropy and the dissociation constant of the system. Top panel: Heat values measured from 28 injections of 10  $\mu\text{L}$  of a 1.4 mM peptide solution into the 1.4288 mL chamber containing 130  $\mu\text{M}$  of Snu13p. Bottom panel: Non-linear least-square fit (using one set of sites model) of the integrated heat data from the top panel as a function of molar ratio.

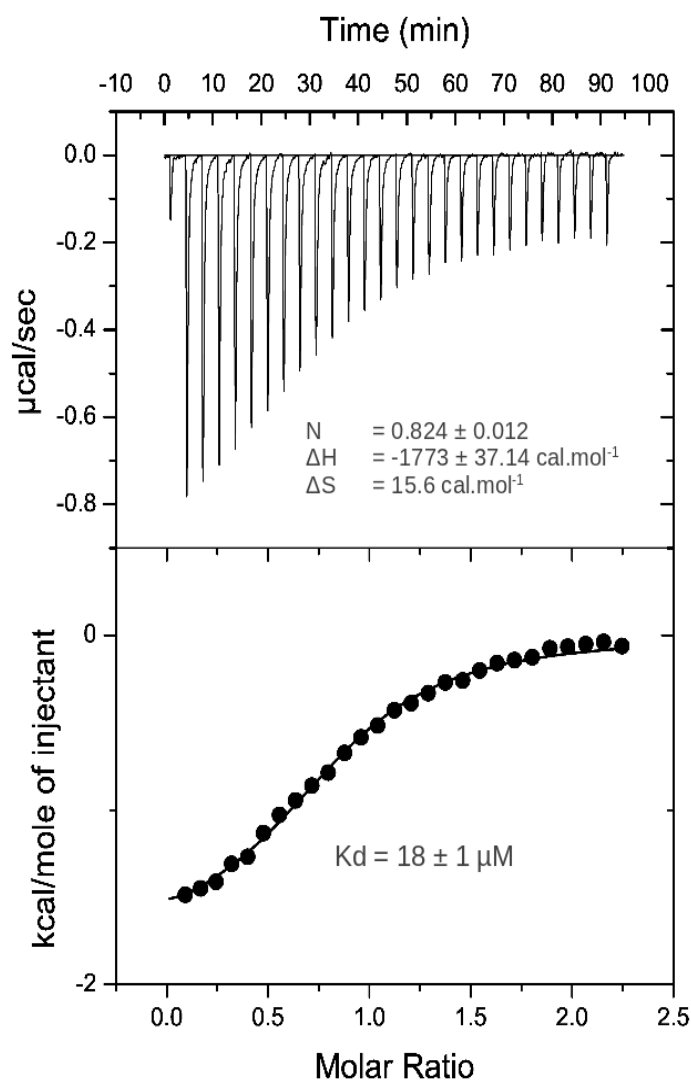

**Figure S4.** NOE connectivities for amide proton amide (N), alpha ( $\alpha$ ) and beta ( $\beta$ ) protons of Rsa1p<sub>238-259</sub>. The NOE intensities are represented by lines with different thicknesses; the intensities of the lines reflect the intensities of the connectivities.

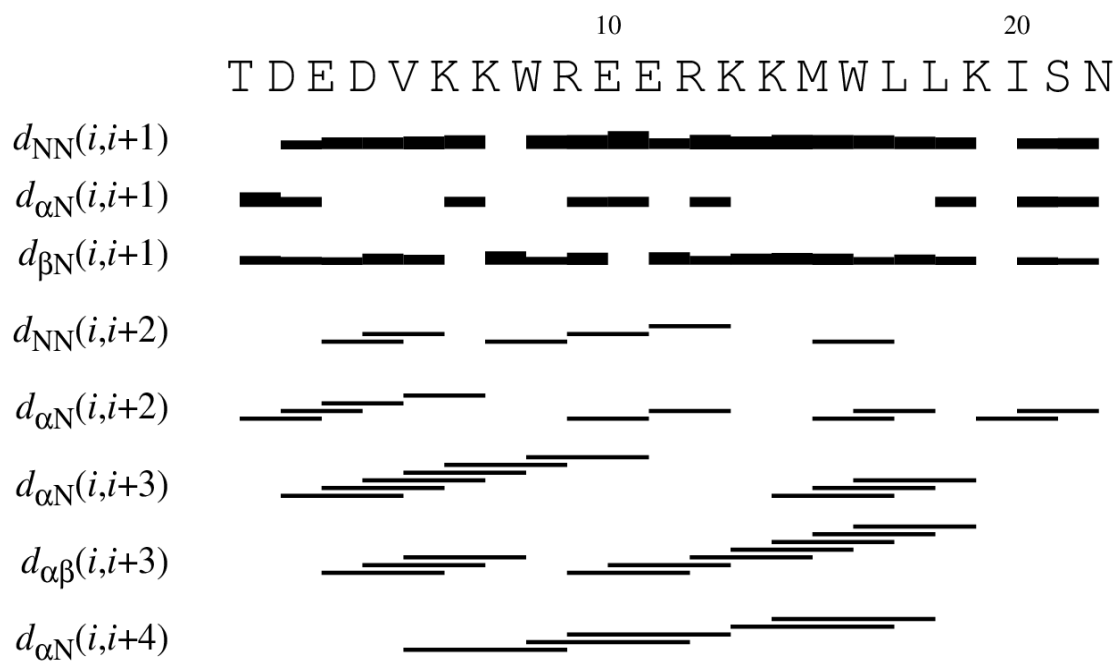

## SUPPLEMENTARY TABLES (S1-S2)

**Table S1.** NMR-Derived Geometrical Restraints and Structural Statistics of Rsa1p<sub>238-259</sub>.

| Restraints                                   | number                  |
|----------------------------------------------|-------------------------|
| Distance restraints                          |                         |
| total of distance restraints                 | 439                     |
| intra                                        | 133                     |
| short                                        | 149                     |
| medium                                       | 157                     |
| Dihedral angles                              |                         |
| $\Psi$                                       | 20                      |
| $\Phi$                                       | 20                      |
| $X_1$                                        | 4                       |
| CNS Violation                                |                         |
| distance violation > 0.5 Å                   | 0                       |
| dihedral violation > 5 degrees               | 0                       |
| Ramachandran statistics (PROCHECK-NMR)       |                         |
| residues in the most favorable region (%)    | 99.5                    |
| residues in additionally allowed regions (%) | 0.5                     |
| residues in generously allowed regions (%)   | 0                       |
| residues in disallowed regions (%)           | 0                       |
| Atoms (residues 3 to 20)                     |                         |
| backbone                                     | rmsd (Å)<br>0.47 ± 0.14 |
| heavy                                        | 1.17 ± 0.22             |

**Table S2. Analysis of the NAMD trajectory calculated on the Snu13p/Rsa1p<sub>238-259</sub> 3D model.**

(A) Backbone RMSD calculated along the trajectory. The reference structure was the previously structure coming from haddock. (B) Mean distance between Rsa1p<sub>238-259</sub> and Snu13p atoms along the trajectory. (C) Salt bridges analysis between Rsa1p<sub>238-359</sub> R<sub>249</sub> and K<sub>250</sub> residues and Snu13p E<sub>72</sub> and D<sub>73</sub> residues. A cut-off of 3.8 Å between acceptor and donor atoms has been defined to evaluate the time occupancy of the salt bridges.

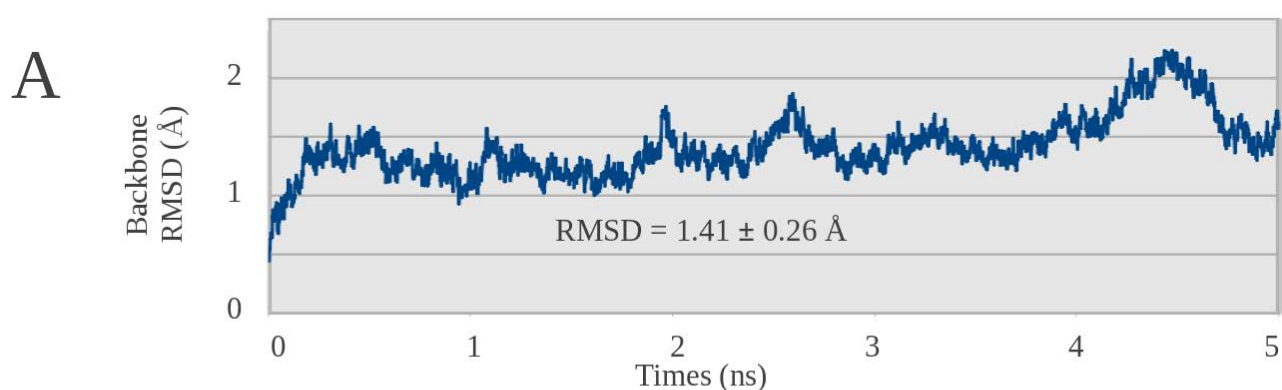

**B**

| Rsa1p <sub>238-259</sub> | Snu13p | Mean distance (Å) | Standard-deviation (Å) |
|--------------------------|--------|-------------------|------------------------|
| W253 Cζ3                 | K7 Cβ  | 7.61              | 0.69                   |
| W253 Cζ3                 | F9 Cβ  | 5.46              | 0.32                   |
| W253 Cζ3                 | L65 Cβ | 7.26              | 0.63                   |
| W253 Cζ3                 | L69 Cβ | 8.08              | 0.54                   |
| W253 Cζ3                 | E72 Cγ | 7.19              | 0.51                   |
| K256 Cδ                  | F9 Cγ  | 5.99              | 0.73                   |
| I257 Cδ1                 | L65 Cγ | 4.98              | 0.50                   |

**C**

| Rsa1p <sub>238-259</sub> | Snu13p | Time occupancy |
|--------------------------|--------|----------------|
| R249                     | E72    | 91.4 %         |
| K250                     | D73    | 98.6 %         |
